# Supplementary material for: Detection of sulfadimethoxine using optical images of liquid crystals
Source: Royal Society of Chemistry journal article supplement (doi:10.1039/c8an02049c), 2019-01-01
Supplement: c8an02049c1.pdf [file c8an02049c1.pdf]

1. The optical images of LCs for Fig. 5g:

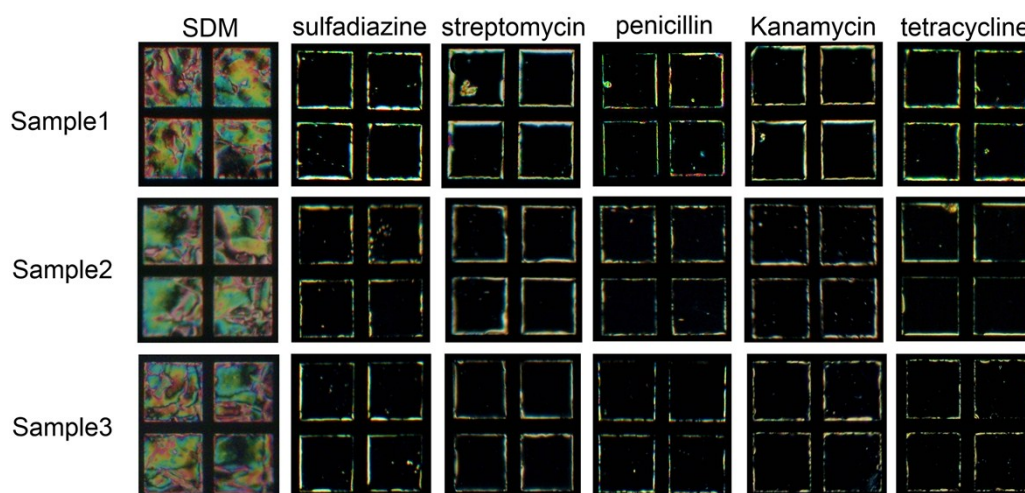

2. The optical images of LCs for Fig. 6:

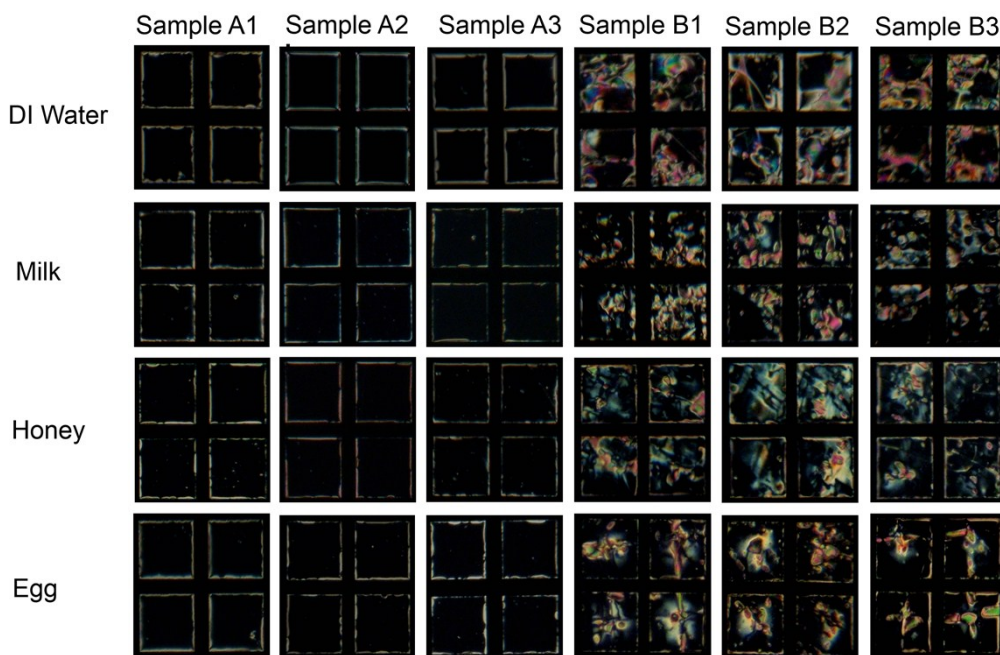

A: Before adding SDM into real samples; B: After adding 20 µg/L SDM into real samples.
